# Supplementary material for: Molecular insight into interactions between the Taf14, Yng1 and Sas3 subunits of the NuA3 complex
Source: PubMed Central journal article supplement (PMC11196586; doi:10.1038/s41467-024-49730-y), 2024-06-24
Supplement: 41467_2024_49730_MOESM1_ESM.pdf [file 41467_2024_49730_MOESM1_ESM.pdf]

## **Supplementary Information**

### **Molecular insight into interactions between the Taf14, Yng1 and Sas3 subunits of the NuA3 complex**

Minh Chau Nguyen, et al.

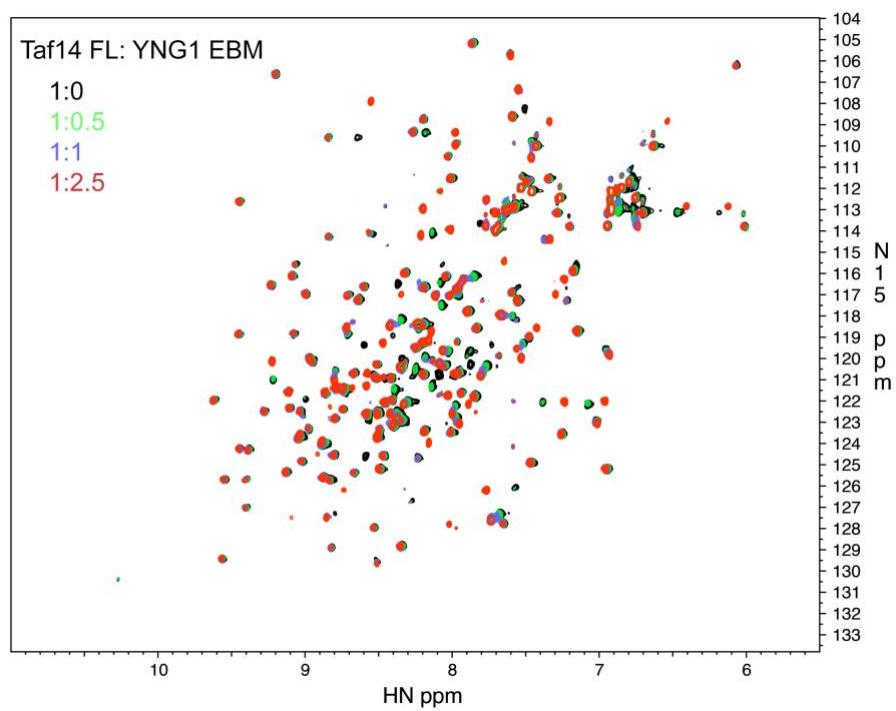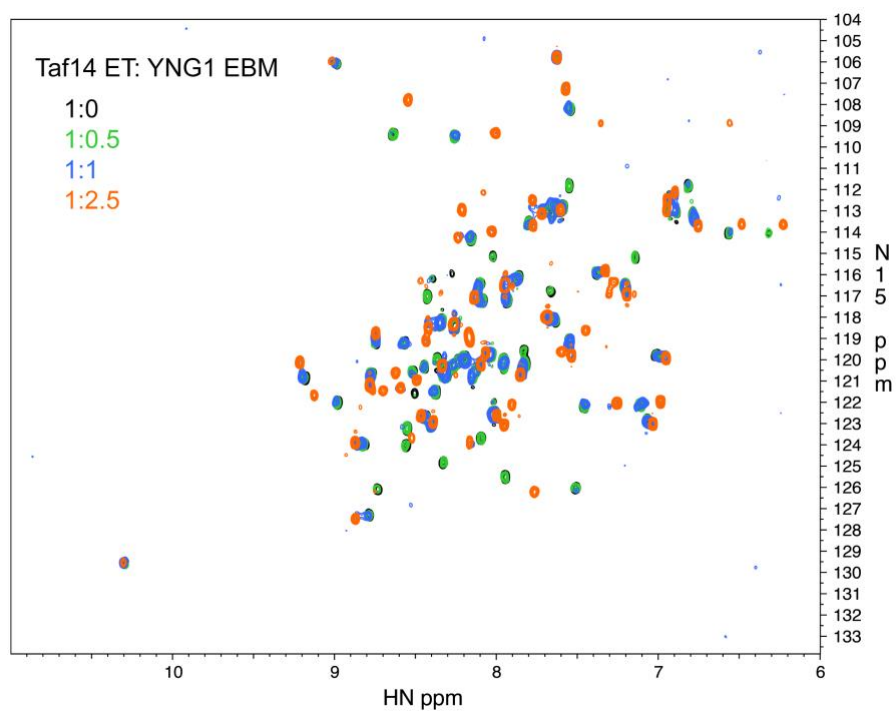

**Supplementary Figure 1.** Superimposed  $^1\text{H}$ ,  $^{15}\text{N}$  HSQC spectra of Taf14<sub>FL</sub> (top) and Taf14<sub>ET</sub> (bottom) recorded in the presence of increasing amounts of Yng1<sub>EBM</sub> peptide. The spectra are color coded according to the protein:peptide molar ratio. Related to Figure 1.

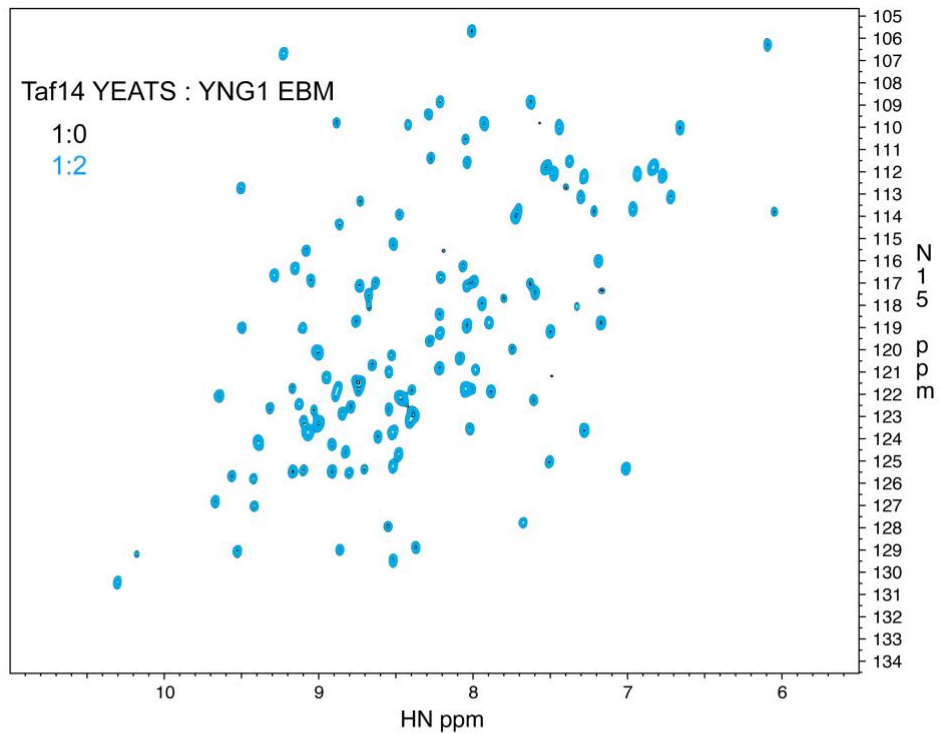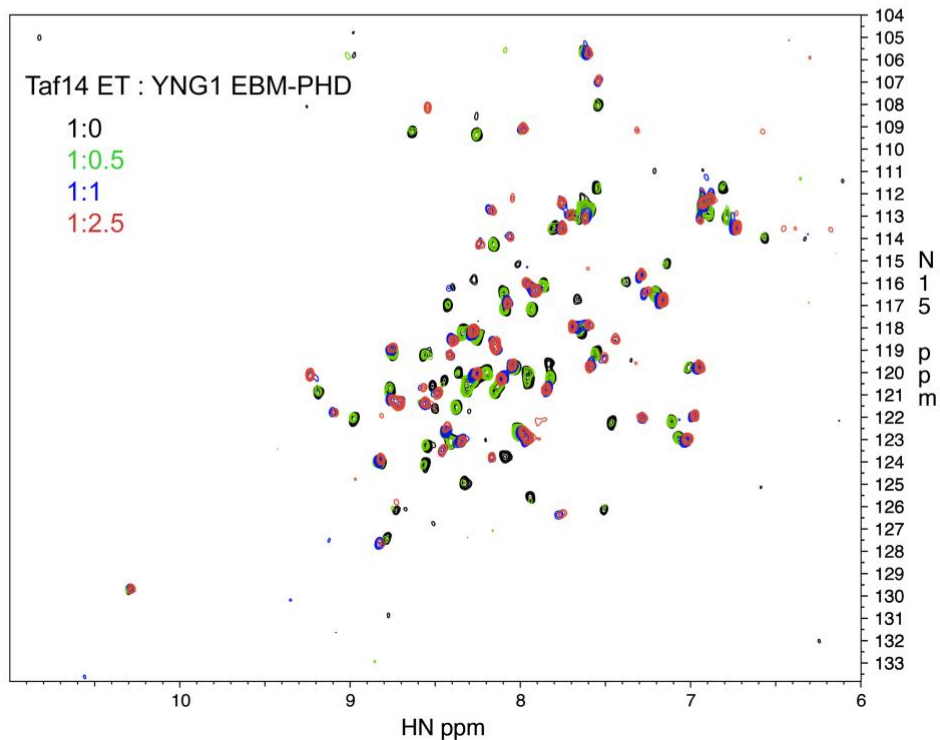

**Supplementary Figure 2.** Superimposed  $^1\text{H}$ ,  $^{15}\text{N}$  HSQC spectra of Taf14<sub>YEATS</sub> in the presence of increasing amounts of Yng1<sub>EBM</sub> peptide (top). Superimposed  $^1\text{H}$ ,  $^{15}\text{N}$  HSQC spectra of Taf14<sub>ET</sub> in the presence of increasing amounts of purified Yng1<sub>EBM-PHD</sub> (bottom). The spectra are color coded according to the protein:ligand molar ratio. Related to Figure 1.

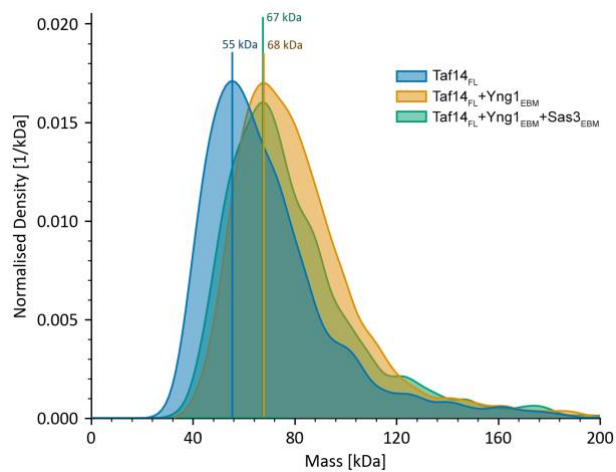

**Supplementary Figure 3.** Mass photometry analysis of molecular weights for Taf14<sub>FL</sub> in the apo-state (blue) or in the presence of one molar equivalent of Yng1<sub>EBM</sub> (orange) or five/one molar equivalents of Sas3<sub>EBM</sub>/Yng1<sub>EBM</sub> (green) indicating the formation of the dimeric states for apo and EBM-bound Taf14<sub>FL</sub>. Theoretical molecular weights for apo- and Yng1<sub>EBM</sub>-bound Taf14<sub>FL</sub> are 55 kDa and 58 kDa, respectively. Maxima of the fits estimated by Kernel Density Estimators (KDE) are labeled. Fits were done with a bandwidth of 3. Related to Figures 2 and 6.

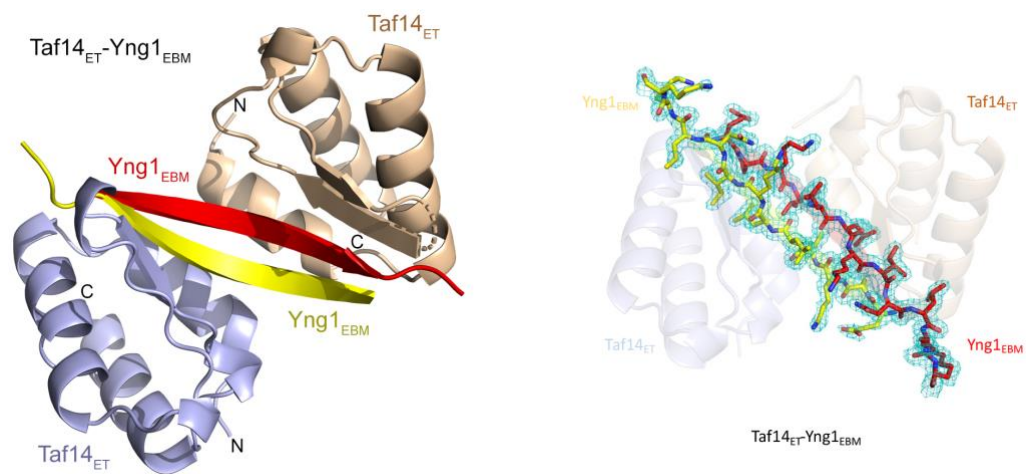

**Supplementary Figure 4.** (left) Ribbon diagram of the Taf14<sub>ET</sub>-Yng1<sub>EBM</sub> complex structure. Dimeric Taf14<sub>ET</sub> is colored light blue (monomer 1) and wheat (monomer 2), and two monomers of dimeric Yng1<sub>EBM</sub> are colored yellow and red. (right) The 2mFo-DFc map for the Yng1<sub>EBM</sub> peptide in the complex contoured at the 1σ level. Related to Figure 2.

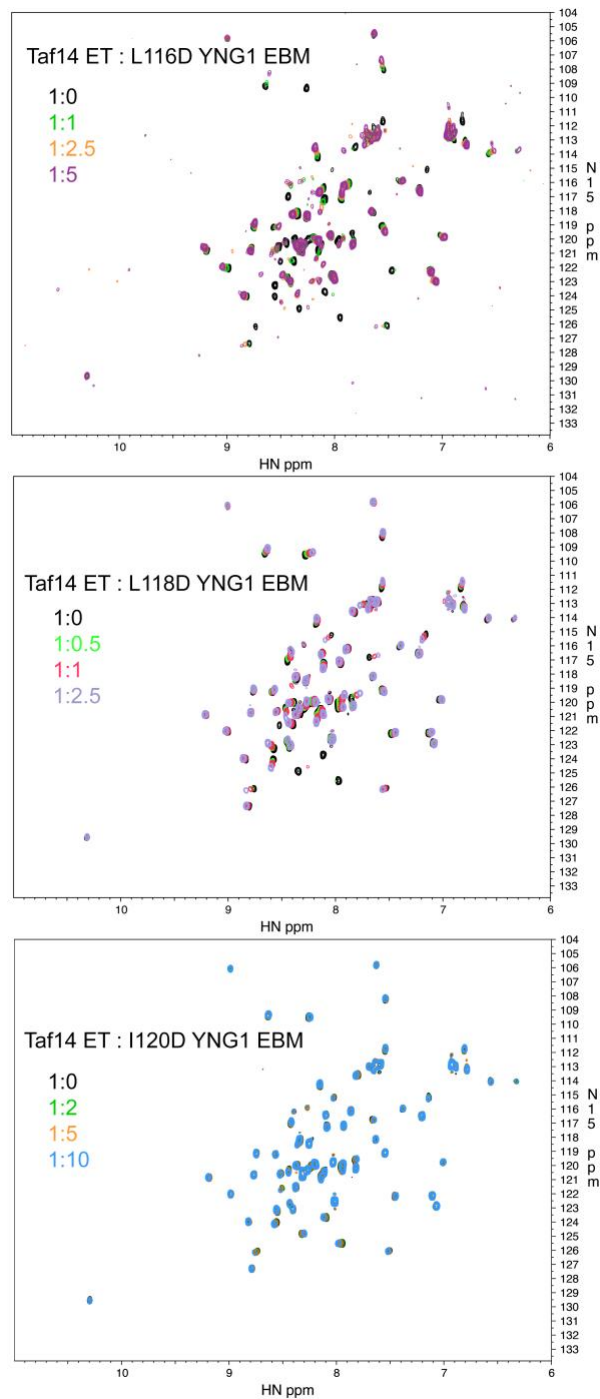

**Supplementary Figure 5.** Superimposed  $^1\text{H}$ ,  $^{15}\text{N}$  HSQC spectra of Taf14<sub>ET</sub> recorded in the presence of increasing amounts of indicated mutated Yng1<sub>EBM</sub> peptides. The spectra are color coded according to the protein:peptide molar ratio. Related to Figure 3.

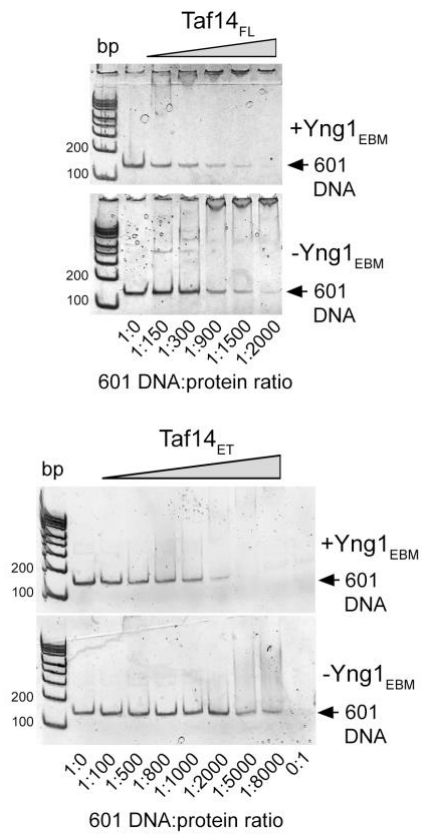

**Supplementary Figure 6.** EMSAs of 601 DNA in the presence of increasing amounts of Taf14<sub>FL</sub> (top) or Taf14<sub>ET</sub> (bottom) +/- Yng1<sub>EBM</sub>. The Taf14 proteins were either preincubated with Yng1<sub>EBM</sub> at a 1:2.5 molar ratio for a minimum of 1 hour on ice or used without Yng1<sub>EBM</sub> prior to addition of DNA. Reaction buffer was supplemented with 100 mM NaCl (top) or 25 mM NaCl (bottom). DNA:protein ratio is shown below gel images. Related to Figure 4.

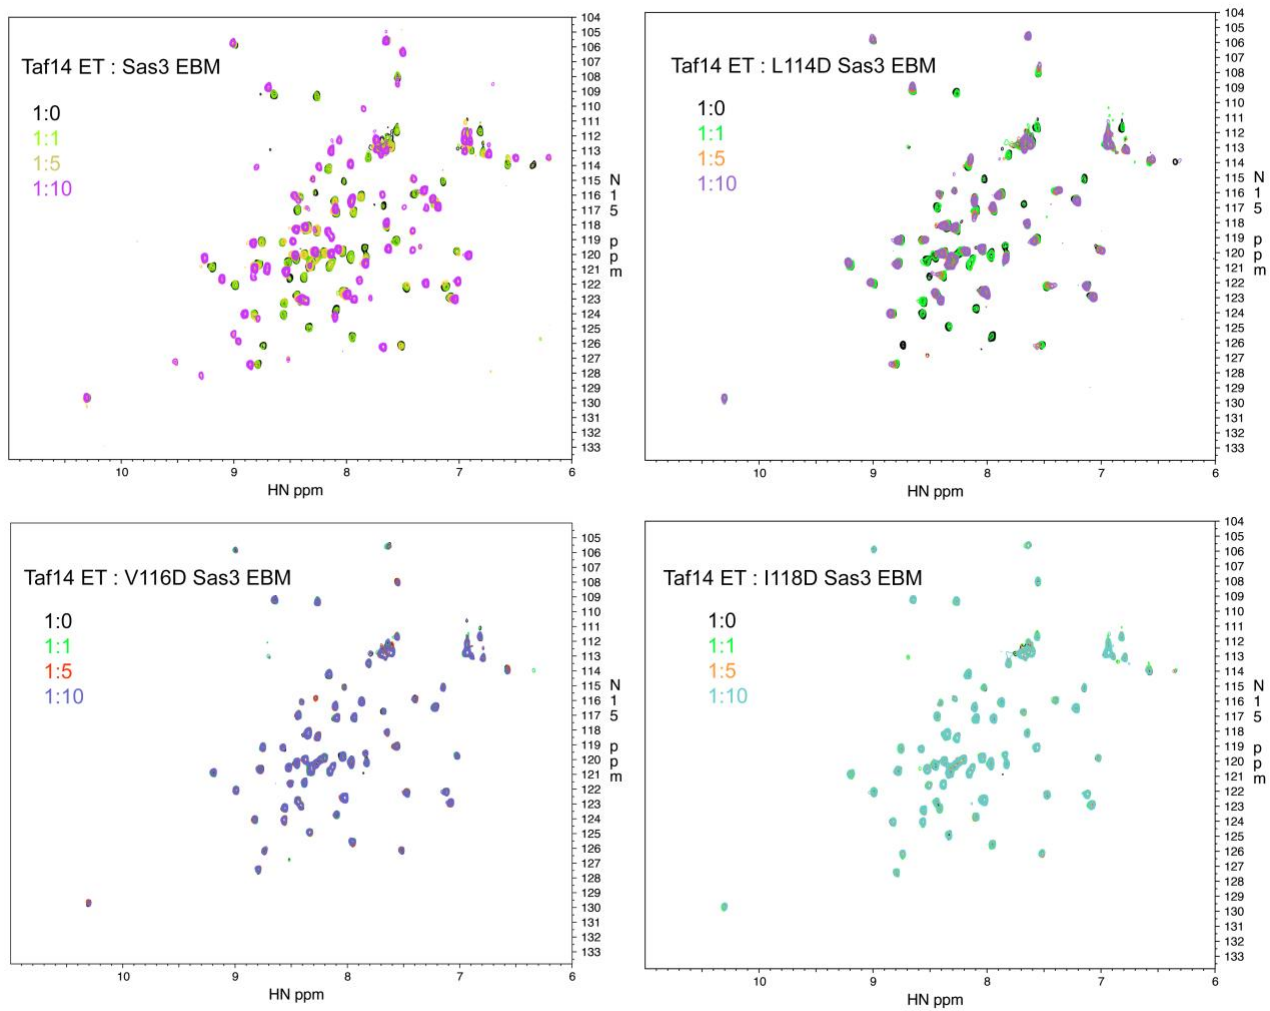

**Supplementary Figure 7.** Superimposed  $^1\text{H}$ ,  $^{15}\text{N}$  HSQC spectra of Taf14<sub>ET</sub> recorded in the presence of increasing amounts of indicated Sas3<sub>EBM</sub> peptides. The spectra are color coded according to the protein:peptide molar ratio. Related to Figure 5.



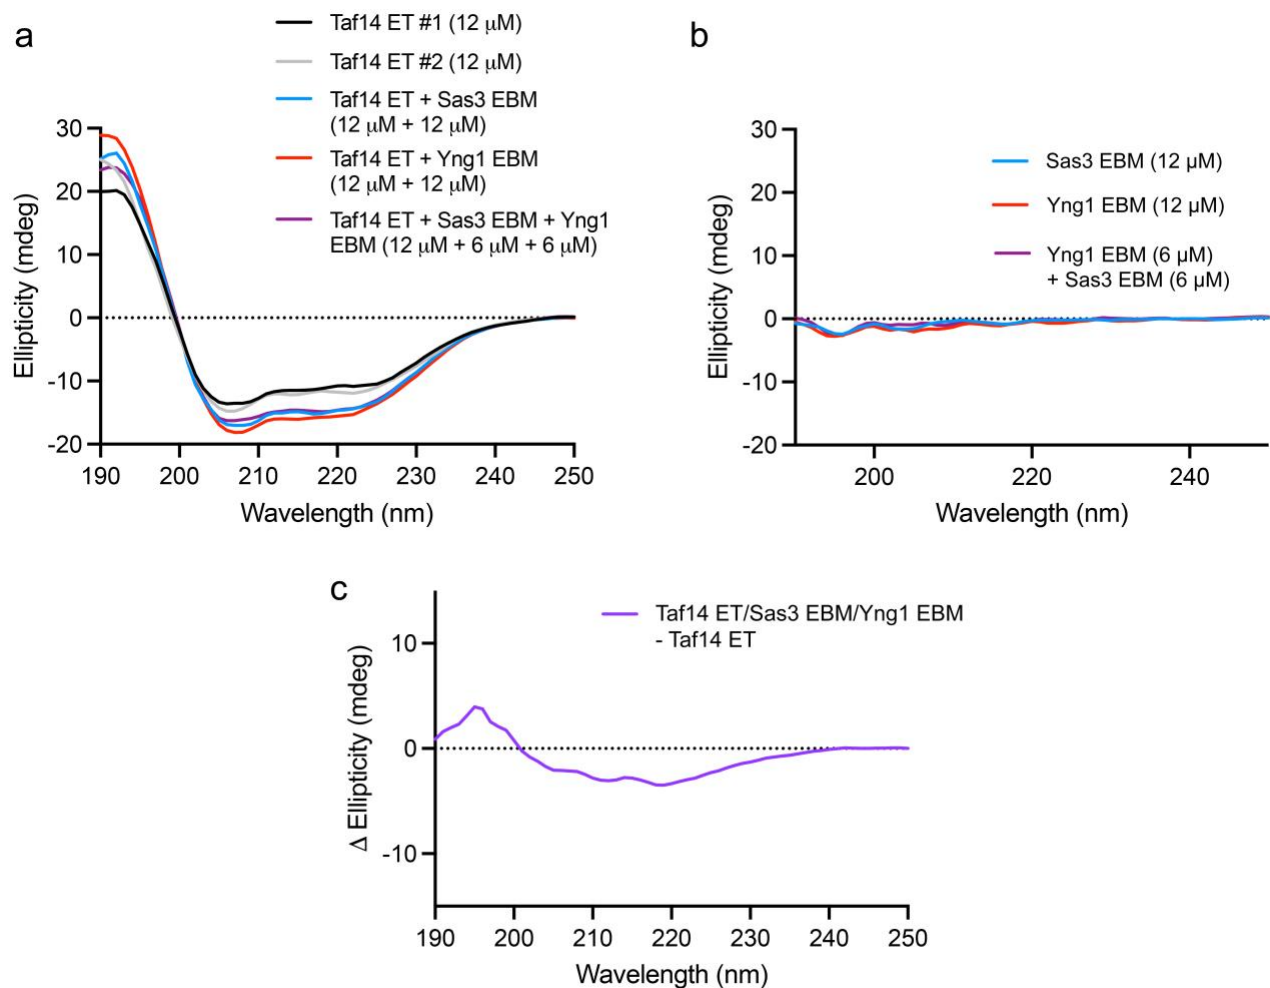

**Supplementary Figure 8.** (a, b) Circular dichroism (CD) spectra of Taf14<sub>ET</sub> in the absence and presence of equimolar quantities of Yng1<sub>EBM</sub> and Sas3<sub>EBM</sub> are shown in (a) and corresponding CD spectra of EBM peptides are shown in (b). (c) Difference between CD spectra of Taf14<sub>ET</sub>+Sas3<sub>EBM</sub>+Yng1<sub>EBM</sub> in a 1:0.5:0.5 molar ratio and the apo-state of Taf14<sub>ET</sub> shows an increase in a  $\beta$ -strand conformation. Related to Figure 6.

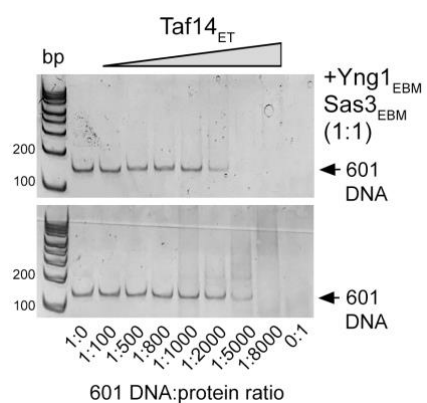

**Supplementary Figure 9.** EMSAs of 601 DNA in the presence of increasing amounts of Taf14<sub>ET</sub> with or without the mixture of Yng1<sub>EBM</sub> and Sas3<sub>EBM</sub>. Taf14<sub>ET</sub> was either preincubated with Yng1<sub>EBM</sub> and Sas3<sub>EBM</sub> at a 1:1:1 molar ratio for a minimum of 1 hour on ice or used without peptides prior to addition of DNA. DNA:protein ratio is shown below gel images. Related to Figure 6.

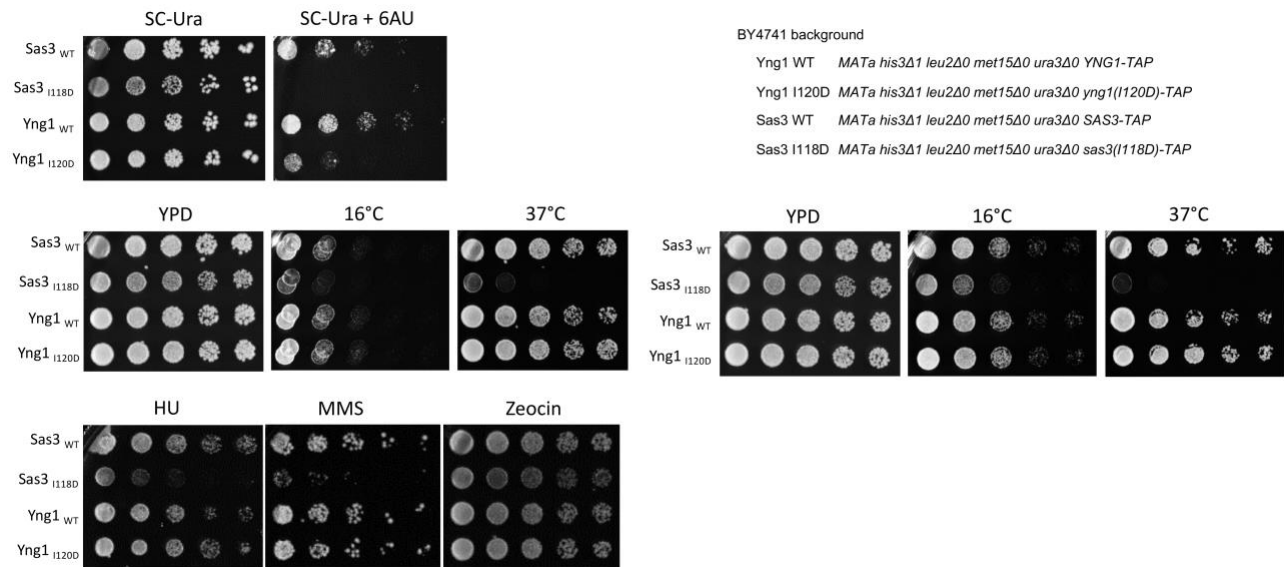

**Supplementary Figure 10.** (top) 0.5 OD<sub>600</sub> of the indicated yeast strains were 5-fold serially diluted on synthetic complete (SC) medium lacking Uracil (SC -Ura) or SC -Ura plates supplemented with 100 µg/ml 6-azauracil (6-AU) and grown for 4 days. Yeast strains used in this study are on the right. (middle) 0.5 OD<sub>600</sub> of the indicated yeast strains were 5-fold serially diluted onto plates containing rich media (YPD) grown at either 30 °C for 3 days, 37 °C for 3 days, or 16 °C for 5 days. (bottom) 0.5 OD<sub>600</sub> of the indicated yeast strains were 5-fold serially diluted onto YPD-containing plates supplemented with either 100 mM hydroxyurea (HU), 0.03% methanesulfonate (MMS), or 5 µg/ml Zeocin and grown at 30 °C for 3 days. Related to Figure 6.

**Supplementary Table 1.** Data collection and refinement statistics. Related to Figure 2.

| Taf14 <sub>ET</sub> -Yng1 <sub>EBM</sub> |                                    |
|------------------------------------------|------------------------------------|
| Wavelength                               |                                    |
| Resolution range                         | 45.84 - 1.933 (2.002 - 1.933)      |
| Space group                              | P 1 21 1                           |
| Unit cell                                | 46.7798 64.6099 64.49 90 101.53 90 |
| Total reflections                        | 55906 (5381)                       |
| Unique reflections                       | 28236 (2781)                       |
| Multiplicity                             | 2.0 (1.9)                          |
| Completeness (%)                         | 99.78 (99.64)                      |
| Mean I/sigma(I)                          | 10.92 (4.36)                       |
| Wilson B-factor                          | 16.43                              |
| R-merge                                  | 0.04643 (0.1498)                   |
| R-meas                                   | 0.06566 (0.2119)                   |
| R-pim                                    | 0.04643 (0.1498)                   |
| CC1/2                                    | 0.995 (0.851)                      |
| CC*                                      | 0.999 (0.959)                      |
| Reflections used in refinement           | 28235 (2781)                       |
| Reflections used for R-free              | 2000 (197)                         |
| R-work                                   | 0.1869 (0.2123)                    |
| R-free                                   | 0.2219 (0.2867)                    |
| CC(work)                                 | 0.946 (0.871)                      |
| CC(free)                                 | 0.913 (0.742)                      |
| Number of non-hydrogen atoms             | 2883                               |
| macromolecules                           | 2552                               |
| ligands                                  | 0                                  |
| solvent                                  | 329                                |
| Protein residues                         | 318                                |
| RMS(bonds)                               | 0.005                              |
| RMS(angles)                              | 0.83                               |
| Ramachandran favored (%)                 | 99.67                              |
| Ramachandran allowed (%)                 | 0.33                               |
| Ramachandran outliers (%)                | 0.00                               |
| Rotamer outliers (%)                     | 0.00                               |
| Clashscore                               | 5.59                               |
| Average B-factor                         | 19.63                              |

Statistics for the highest-resolution shell are shown in parentheses.
