# Supplementary material for: Molecular insight into interactions between the Taf14, Yng1 and Sas3 subunits of the NuA3 complex
Source: PubMed Central journal article supplement (PMC11196586; doi:10.1038/s41467-024-49730-y), 2024-06-24
Supplement: 41467_2024_49730_MOESM3_ESM.pdf [file 41467_2024_49730_MOESM3_ESM.pdf]

**Description of Additional supplementary File:**

**Supplementary Data 1:** All pathways enriched in list of genes with promoters co-occupied by Taf14 and Yng1
